# Supplementary material for: Kinetics of liquid phase batch adsorption experiments
Source: Springer Nature journal article supplement (doi:10.1007/s10450-020-00258-9), 2020-09-11
Supplement: MOESM1 [file 18372108]

# Kinetics of Liquid Phase Batch Adsorption Experiments

Stefano Brandani

[s.brandani@ed.ac.uk](mailto:s.brandani@ed.ac.uk)

School of Engineering, University of Edinburgh, Edinburgh, UK

## Supplementary Material

Figures with linearised plots and comparisons of PFO, PSO and Elovich kinetics with uptake curves for all remaining cases. These are ordered on the basis of the nonlinearity parameter , from the highest to the lowest with the pure diffusion case before the equivalent case with Sh = 2 when this has been calculated.

Figure S-1. Linearized plot and linear regression of data using the PFO, PSO and Elovich models. Highlighted points are those used in establishing the trendline. Lower right plot shows the linear plot of the uptake data with the curves calculated from the parameters obtained from the *unconstrained* linear regression. p-Xylene mol m–3, gr, .

Figure S-2. Linearized plot and linear regression of data using the PFO, PSO and Elovich models. Highlighted points are those used in establishing the trendline. Lower right plot shows the linear plot of the uptake data with the curves calculated from the parameters obtained from the *unconstrained* linear regression. p-Xylene mol m–3, gr, and Sh = 2.

Figure S-3. Linearized plot and linear regression of data using the PFO, PSO and Elovich models. Filled points are those used in establishing the trendline. Lower right plot shows the linear plot of the uptake data with the curves calculated from the parameters obtained from the *unconstrained* linear regression. For the PFO model an additional curve is shown with the correct final concentration. p-Xylene mol m–3, gr, and Sh = 2.

Figure S-4. Linearized plot and linear regression of data using the PFO, PSO and Elovich models. Highlighted points are those used in establishing the trendline. Lower right plot shows the linear plot of the uptake data with the curves calculated from the parameters obtained from the *unconstrained* linear regression. p-Xylene mol m–3, gr, .

Figure S-5. Linearized plot and linear regression of data using the PFO, PSO and Elovich models. Highlighted points are those used in establishing the trendline. Lower right plot shows the linear plot of the uptake data with the curves calculated from the parameters obtained from the *unconstrained* linear regression. m-Xylene mol m–3, gr, .

Figure S-6. Linearized plot and linear regression of data using the PFO, PSO and Elovich models. Highlighted points are those used in establishing the trendline. Lower right plot shows the linear plot of the uptake data with the curves calculated from the parameters obtained from the *unconstrained* linear regression. p-Xylene mol m–3, gr, .

Figure S-7. Linearized plot and linear regression of data using the PFO, PSO and Elovich models. Highlighted points are those used in establishing the trendline. Lower right plot shows the linear plot of the uptake data with the curves calculated from the parameters obtained from the *unconstrained* linear regression. For the PFO model an additional curve is shown with the correct final concentration. m-Xylene mol m–3, gr, .

Figure S-8. Linearized plot and linear regression of data using the PFO, PSO and Elovich models. Filled points are those used in establishing the trendline. Lower right plot shows the linear plot of the uptake data with the curves calculated from the parameters obtained from the *unconstrained* linear regression. m-Xylene mol m–3 and gr, and Sh = 2.
